# Supplementary material for: Conflicting Messages on Food and Beverage Packages: Front-of-Package Nutritional Labeling, Health and Nutrition Claims in Brazil
Source: PubMed Central journal article supplement (PMC6950677; doi:10.3390/nu11122967), 2019-12-05
Supplement: nutrients-11-02967-s001.pdf [file nutrients-11-02967-s001.pdf]

**Table S1.** Presence of claims in the front of the package of Brazilian packaged foods and beverages high in free sugars, saturated fat and sodium. Brazil, 2017.

| Food Category                        | Presence of Health Claims |      |               |      |         |      | Presence of Nutrition Claims |      |               |      |         |      | Presence of Environment Claims |      |               |       |         |       |
|--------------------------------------|---------------------------|------|---------------|------|---------|------|------------------------------|------|---------------|------|---------|------|--------------------------------|------|---------------|-------|---------|-------|
|                                      | High in Free              |      | High in       |      | High in |      | High in Free                 |      | High in       |      | High in |      | High in Free                   |      | High in       |       | High in |       |
|                                      | Sugars                    |      | Saturated Fat |      | Sodium  |      | Sugars                       |      | Saturated Fat |      | Sodium  |      | Sugars                         |      | Saturated Fat |       | Sodium  |       |
|                                      | N                         | %    | N             | %    | N       | %    | N                            | %    | N             | %    | N       | %    | N                              | %    | N             | %     | N       | %     |
| Breakfast cereals and granola bars   | 2                         | 33.3 | 12            | 28.6 | 1       | 2.4  | 14                           | 66.7 | 25            | 30.1 | 4       | 4.8  | 3                              | 60.0 | 2             | 20.0  | 1       | 10.0  |
| Bakery products                      | 0                         | 0.0  | 10            | 20.0 | 34      | 68.0 | 0                            | 0.0  | 11            | 13.9 | 58      | 73.4 | .                              | .    | 1             | 25.0  | 1       | 25.0  |
| Convenience foods                    | .                         | .    | 18            | 32.1 | 45      | 80.4 | 0                            | 0.0  | 16            | 28.1 | 47      | 82.5 | 0                              | 0.0  | 1             | 7.1   | 12      | 85.7  |
| Unsweetened dairy products           | 0                         | 0.0  | 1             | 4.5  | 0       | 0.0  | 0                            | 0.0  | 1             | 4.8  | 0       | 0.0  | .                              | .    | 0             | 0.0   | 0       | 0.0   |
| Sweetened dairy products             | 10                        | 71.4 | 6             | 11.5 | 2       | 3.8  | 11                           | 73.3 | 6             | 12.5 | 3       | 6.3  | .                              | .    | .             | .     | .       | .     |
| Salty snacks                         | 0                         | 0.0  | 13            | 52.0 | 12      | 48.0 | 0                            | 0.0  | 14            | 45.2 | 17      | 54.8 | .                              | .    | 7             | 100.0 | 6       | 85.7  |
| Cookies                              | 9                         | 50.0 | 28            | 53.8 | 9       | 17.6 | 13                           | 52.0 | 45            | 49.5 | 21      | 23.1 | .                              | .    | 7             | 87.5  | 0       | 0.0   |
| Canned vegetables                    | .                         | .    | 1             | 14.3 | 5       | 71.4 | .                            | .    | 0             | 0.0  | 3       | 75.0 | .                              | .    | 0             | 0.0   | 3       | 100.0 |
| Oils and fats                        | 0                         | 0.0  | 4             | 30.8 | 1       | 8.3  | 0                            | 0.0  | 9             | 27.3 | 5       | 15.2 | .                              | .    | 0             | 0.0   | 0       | 0.0   |
| Sauces and dressings                 | 0                         | 0.0  | 8             | 24.2 | 21      | 63.6 | 6                            | 75.0 | 18            | 46.2 | 35      | 89.7 | 0                              | 0.0  | 1             | 12.5  | 5       | 62.5  |
| Coffee and tea                       | .                         | .    | 0             | 0.0  | 0       | 0.0  | .                            | .    | .             | .    | .       | .    | .                              | .    | 0             | 0.0   | 0       | 0.0   |
| Candies and desserts                 | 12                        | 44.4 | 19            | 32.8 | 4       | 6.9  | 17                           | 39.5 | 28            | 29.8 | 17      | 18.1 | .                              | .    | 4             | 57.1  | 0       | 0.0   |
| Cereals, beans, other grain products | 0                         | 0.0  | 0             | 0.0  | 2       | 3.8  | 0                            | 0.0  | 1             | 1.1  | 9       | 10.3 | 0                              | 0.0  | 0             | 0.0   | 1       | 5.9   |
| Packaged fruits and vegetables       | 0                         | 0.0  | 0             | 0.0  | 0       | 0.0  | 0                            | 0.0  | 0             | 0.0  | 0       | 0.0  | 0                              | 0.0  | 0             | 0.0   | 0       | 0.0   |
| Meat, poultry, seafood, and egg      | .                         | .    | 0             | 0.0  | 0       | 0.0  | .                            | .    | 0             | 0.0  | 0       | 0.0  | .                              | .    | 0             | 0.0   | 0       | 0.0   |

|                                       |           |             |            |             |            |             |           |             |            |             |            |             |          |             |           |             |           |             |
|---------------------------------------|-----------|-------------|------------|-------------|------------|-------------|-----------|-------------|------------|-------------|------------|-------------|----------|-------------|-----------|-------------|-----------|-------------|
| Sugar and other noncaloric sweeteners | .         | .           | 0          | 0.0         | 0          | 0.0         | 0         | 0.0         | 0          | 0.0         | 0          | 0.0         | .        | .           | 0         | 0.0         | 0         | 0.0         |
| Processed meats                       | .         | .           | 14         | 43.8        | 29         | 90.6        | .         | .           | 12         | 40.0        | 28         | 93.3        | .        | .           | 0         | 0.0         | 2         | 100.0       |
| Juices                                | 2         | 15.4        | 0          | 0.0         | 0          | 0.0         | 3         | 21.4        | 0          | 0.0         | 0          | 0.0         | 3        | 75.0        | 0         | 0.0         | 0         | 0.0         |
| Nectars                               | 3         | 100.0       | 0          | 0.0         | 0          | 0.0         | 3         | 100.0       | 0          | 0.0         | 0          | 0.0         | 1        | 100.0       | 0         | 0.0         | 0         | 0.0         |
| Fruit-flavored drinks                 | 4         | 50.0        | 0          | 0.0         | 0          | 0.0         | 12        | 60.0        | 0          | 0.0         | 0          | 0.0         | .        | .           | .         | .           | .         | .           |
| Sodas                                 | 0         | 0.0         | 0          | 0.0         | 0          | 0.0         | 3         | 25.0        | 0          | 0.0         | 0          | 0.0         | .        | .           | .         | .           | .         | .           |
| Other beverages                       | 11        | 47.8        | 1          | 1.9         | 9          | 16.7        | 8         | 38.1        | 1          | 2.0         | 6          | 12.0        | 2        | 33.3        | 0         | 0.0         | 0         | 0.0         |
| Nuts and seeds                        | .         | .           | .          | .           | .          | .           | .         | .           | 0          | 0.0         | 0          | 0.0         | .        | .           | 0         | 0.0         | 0         | 0.0         |
| Cheeses                               | .         | .           | 1          | 5.9         | 14         | 82.4        | .         | .           | 20         | 50.0        | 36         | 90.0        | .        | .           | 0         | 0.0         | 2         | 100.0       |
| Fruit preserve                        | 3         | 60.0        | 0          | 0.0         | 0          | 0.0         | 5         | 71.4        | 0          | 0.0         | 0          | 0.0         | 0        | 0.0         | 0         | 0.0         | 0         | 0.0         |
| <b>Total</b>                          | <b>56</b> | <b>38.6</b> | <b>136</b> | <b>17.8</b> | <b>188</b> | <b>24.5</b> | <b>95</b> | <b>44.4</b> | <b>207</b> | <b>20.9</b> | <b>289</b> | <b>29.2</b> | <b>9</b> | <b>37.5</b> | <b>23</b> | <b>13.6</b> | <b>33</b> | <b>18.2</b> |
